# Supplementary material
Source: PubMed Central journal article supplement (PMC3756661)
Supplement: NIHMS504210-supplement-05.pdf [file NIHMS504210-supplement-05.pdf]

**An extracellular interactome of cell surface Immunoglobulin and Leucine-rich repeat proteins reveals novel receptor-ligand networks**

**Supplemental Data Inventory:**

**Figure S1**, related to Figure 1. **The Extracellular Interactome Assay.**

**Figure S2**, related to Figure 2. **Normalized ECIA Data.**

**Figure S3**, related to Figure 4. **The four IgSF subfamilies of *Drosophila*.**

**Figure S4**, related to Figure 3. **The EGF and Hh Signaling Pathways Intersect.**

**Figure S5**, related to Figure 4. **Surface Plasmon Resonance sensorgrams and isotherms.**

**Figure S6**, related to Figure 5. **Patterning of CNS axons in *fas2* mutants.**

**Figure S7**, related to Figure 6. **Specific interactions between Roundabout (Robo) family receptors and their ligand Slit can be detected by AP<sub>5</sub>-fusion protein binding to live embryos.**

**Table S1**, related to Figure 1. **The list of proteins studied in this work.**

**Table S2**, related to Figure 2. **List of the interactions detected by the Extracellular Interactome Assay.**

**Table S3**, related to Figure 3. **The list of interactions reported in the DroID database for *Drosophila* proteins containing extracellular IgSF, FnIII or LRR domains.**

**Table S4**, related to Figure 3. **Details on noteworthy interactions in existing interactome databases.**

## SUPPLEMENTAL DATA

**Table S1**, related to Figure 1. **The list of proteins studied in this work.** All commonly used annotation was added from FlyBase (<http://flybase.org>), and extracellular domain size and domain predictions (columns J-O) were made as explained in the main-text and extended Experimental Procedures. In column M, “Y” indicates the presence of a signal peptide, and SA indicates a possible signal anchor, although such an assignment cannot always be made with confidence. In column N, “TM” and “GPI” indicate the presence of transmembrane helices and GPI linkages respectively. Domain definitions of LRR domains are further specified as “LRR[N-terminal cap,LRR repeats,C-terminal cap]”, and are communicated to us by Kevin J. Mitchell and Karsten Hokamp, based on Dolan et al, 2007. LRR domains may have undetected cap domains or LRR repeats. Relative expression levels of all cloned proteins in bait and prey forms are reported in columns P-Q. All differences between sequences of our constructs and the *Drosophila* genomic sequences are remarked (column S), and known extracellular interactions from literature are noted (column T).

**Figure S1**, related to Figure 1. **The Extracellular Interactome Assay.** (A) Circular maps for the *Drosophila* expression plasmids drawn to approximate scale. (B) Schematic drawings of the baits and prey expressed. (C) Titration ECIA, where six interactions between the indicated Fc (bait) and an AP<sub>5</sub> (prey) samples are studied via dilution of the Fc and AP<sub>5</sub> samples. Green samples indicate abundant samples, compared to the limiting, red samples. When the bait and prey sample molarities are within 2-fold of each other, they are not colored. (D) Co-dilutions of Fc (bait) and AP<sub>5</sub> (prey) demonstrate that binding signal is lost when the sample with lower abundance, regardless of being bait or prey, is diluted. (E, F) Titration curves for Fc (E) and AP<sub>5</sub> (F) dilution experiments (from [C]) fit to a single-site binding model. (G) Titration curves for dilution ECIA where half saturation could be achieved, demonstrating that specific binding models can be successfully fit to data, and that effective affinities of the pentamers are two-to-three orders of magnitude stronger than those of their monomeric counterparts.

**Figure S2**, related to Figure 2. **Normalized ECIA Data.** Matrices (half squares) contain final ECIA scores (See Extended Experimental Protocols) for each interaction on a black to white scale, going left to right and top to bottom in the order of internal sample numbers used in this study (Table S1, column A), for **(A)** the Extracellular Interactome Assay of the *Drosophila* IgSF, and **(B)** the Extracellular Interactome Assay of the IgSF, FnIII and LRR. The data within the green triangle is a reproduction of the IgSF-only Interactome in (A), and closely matches it. Insets in A and B show eight interactions, denoted in (C), out of which, seven were observed in either of the ECIAs. Visual comparison of positives between A and B demonstrates the reproducibility the ECIA at large scale.

**Table S2**, related to Figure 2. **List of the interactions detected by the Extracellular Interactome Assay.** Also included are interactions not detected by the Extracellular Interactome, but established in the literature, with possible reasons for our failure to detect (column H).

**Table S3**, related to Figure 3. **The list of interactions reported in the DroID database for Drosophila proteins containing extracellular IgSF, FnIII or LRR domains.** Green boxes indicate the extracellular IgSF, FnIII, and LRR proteins. Red boxes indicate proteins that are unlikely to bind extracellular and cell surface proteins due to having incompatible cellular compartments. DPiM data has been filtered to only include interactions with significant HGScores. The thick-boxed line highlights the only confirmed interaction from this dataset: ImpL2-Ilp2.

**Figure S3**, related to Figure 4. **The four IgSF subfamilies of *Drosophila*.**

**(A-D)** The IgSF subfamilies can also be recognized by their conserved domain topologies. DIPs (D) are all membrane-attached three-domain receptors, while Dprs (C) and Beats (A) are membrane-attached or secreted two-domain extracellular proteins. Sides (B) are six-domain transmembrane proteins with PDZ peptide sequences at their C termini.

(E) The three Ig domains of DIPs are closely related, as observed in their multiple sequence alignment. The lines over indicate the three Ig domains: Black for Ig1, orange for Ig2, and blue for Ig3. The conserved disulfide-forming cysteines of all three domains are labeled in the alignment as red and orange columns for the B-strand and the F-strand cysteines, respectively.

(F) The phylogenetic tree for the *Drosophila* IgSF. The multiple sequence alignment (not shown) and the phylogenetic tree of all *Drosophila* IgSF were created with Clustal Omega and Archaeopteryx.

**Figure S4, related to Figure 3. The EGF and Hh Signaling Pathways Intersect.**

(A) The interaction network of Hh, boi, ihog, Vn, EGFR and kek1, as observed with the Extracellular Interactome Assay. The line colors and shape scheme is the same as in Figure 3.

(B) The Vn-Boi “Domain-ome”: The Extracellular Interactome Assay applied to domains of Vein and Boi.

(C) The domain structures of Hh, Ihog/Boi, Vn and EGFR drawn to approximate scale. Arrows indicate the domains mediating interactions.

(D) A proposed structural model for a complex of EGF and Hedgehog pathway components on the cell. Coloring of the proteins and domains are as in (C). The double-sided arrow indicates the discovered Vn-Boi interaction. The model is based on the structures of the complex of *Drosophila* EGFR with Spitz (PDB ID: 3LTF), the complex of Hh with ihog (PDB ID: 2IBG), a model of the EGF domain of Vn produced with MODELLER (Eswar et al., 2006), and N-terminal domains of Boi and Vn modeled with PHYRE-2 (Kelley and Sternberg, 2009).

**Figure S5, related to Figure 4. Surface Plasmon Resonance** sensorgrams (top) and binding isotherms (bottom) for (A) CG12950 (stationary phase) and BeatIV (mobile phase), (B) CG12950 (stationary) and BeatIV (mobile), (C) Dpr6 (stationary) and CG32791 (mobile), (D) Vein (stationary) and Boi (mobile). Equilibrium binding responses are fit successfully to Langmuir isotherms. Each color in the binding sensorgrams represent the concentration of the analyte in mobile phase. The color scheme

is preserved in the binding isotherms below. Zero-second timepoint indicates analyte injection.

**Figure S6**, related to Figure 5. **Patterning of CNS axons in *fas2* mutants.** Wild-type (A, A<sub>1</sub>) and *fas2*<sup>EB112</sup> (B, B<sub>1</sub>) embryos were double-stained with Fas2-AP<sub>5</sub> (green) and anti-HRP (red). (A, B) show both signals, and (A<sub>1</sub>, B<sub>1</sub>) show only the anti-HRP signal. The longitudinal tracts are visible in (A). In (B), there is no Fas2-AP<sub>5</sub> staining. The CNS axon array in *fas2*<sup>EB112</sup> (B<sub>1</sub>) is indistinguishable from the wild-type array (A<sub>1</sub>).

**Figure S7**, related to Figure 6. **Specific interactions between Roundabout (Robo) family receptors and their ligand Slit can be detected by AP<sub>5</sub>-fusion protein binding to live embryos.**

Staining was performed as in Figures 5, 6, and 7, except that binding of Robo, Lea (Robo2), and Robo3-AP<sub>5</sub> supernatants was detected with Alexa 568 (red) and anti-Fas2 mAb staining with Alexa 488 (green).

**(A-C)** Wild-type embryos stained with Robo-AP<sub>5</sub> (A<sub>1</sub>), Robo2-AP<sub>5</sub> (B<sub>1</sub>), and Robo3-AP<sub>5</sub> (C<sub>1</sub>). Each of these fusion proteins stains the expected pattern of Slit-expressing midline glia (arrows), and Robo2 and Robo3-AP<sub>5</sub> stain muscle attachment sites (arrowheads), which also express Slit. Slit synthesized by midline glia is known to be transferred onto longitudinal axons. Note, however, that Robo-AP<sub>5</sub> does not stain axons, while Robo3-AP<sub>5</sub> does (double arrowhead). Robo2-AP<sub>5</sub> shows weak staining of medial axons.

**(D-F)** Embryos homozygous for a null *slit* mutation (*slit/slit*) have a severe phenotype in which all CNS axons collapse onto the midline (D, E, F). They do not stain with any of the Robo family AP fusion proteins (D<sub>1</sub>, E<sub>1</sub>, F<sub>1</sub>). This shows that all staining with these fusion proteins, including CNS axon staining by Robo2-AP<sub>5</sub> and Robo3-AP<sub>5</sub>, is due to binding to Slit protein.

## **EXTENDED EXPERIMENTAL PROTOCOLS**

*Bioinformatics for Drosophila IgSF, FnIII and LRR-type proteins*

We have built a list of all extracellular *Drosophila* IgSF, FnIII and LRR proteins (including the other L-Domain Superfamily proteins) (Table S1) based on previously published annotations of these families (Dolan et al., 2007; Hynes and Zhao, 2000; Kurusu et al., 2008; Vogel et al., 2003), and improved by several up-to-date databases and tools, including SMART (Letunic et al., 2012), SUPERFAMILY (Wilson et al., 2009), Pfam (Punta et al., 2012) and InterPro (Hunter et al., 2009, 2012). We also manually checked all proteins for expected features, such as signal peptides at their 5' ends, transmembrane helices and complete domain structures, resulting in selecting better splice variants for expression and improving gene predictions by combining neighboring genes into single proteins. Furthermore, in cases where expected protein features appeared to be incomplete or lacking (such as half an Ig domain at a gene boundary, or a missing signal peptide at the 5' end), or when predictions were weak, we checked orthologous genes in other available arthropod genomes to improve our gene predictions, gene boundaries and features such as signal peptides and transmembrane helices.

For the determination of signal peptides, transmembrane helices and GPI linkages, we used Phobius (Käll et al., 2007), SignalP version 3 (Bendtsen et al., 2004), TMHMM version 2 (Krogh et al., 2001), Big-PI Predictor (Eisenhaber et al., 1999), and visual inspection of Kyte-Doolittle plots, coupled to searches in orthologous arthropod sequences when predictions were ambiguous. We also searched literature for reported instances of GPI modifications for proteins of interest.

As a result, we have identified 129 IgSF, 59 FnIII and 71 LRR-containing *Drosophila melanogaster* proteins, making up a collection of 202 proteins (Figure 1-Step 1, Table S1), with the said domains residing in the extracellular compartment. There are 43 proteins that contain both extracellular IgSF and FnIII domains, 10 that contain both extracellular IgSF and LRR, and four that contain both extracellular FnIII and LRR domains (Figure 1). Overall, the *Drosophila* genome encodes for ~3300 proteins with signal peptides, and ~500 with a signal peptide (SP) and one transmembrane helix (TM) (Personal communication with Nick Grishin). The set of proteins we identified, which are

mostly SP+1TM proteins, makes a significant portion (~30%) of all *Drosophila* SP+1TM proteins.

For an overall analysis of all IgSF sequences, a multiple sequence alignment and a phylogenetic tree of all *Drosophila* IgSF (Figure S4) were created with Clustal Omega (Sievers et al., 2011). Phylogenetic trees are visualized and captured in Seaview (Gouy et al., 2010) and Archaeopteryx (Han and Zmasek, 2009).

It should also be noted here that while IgSF and FnIII proteins are mostly extracellular, LRR protein family appears to be equally represented in the intracellular and extracellular milieu. Most cell surface LRR proteins contain only this annotated domain in their extracellular regions, but a few also contain IgSF and/or FnIII domains (Figure 1). Capitalization of protein names (in Figure 3 and elsewhere applicable) was kept consistent with FlyBase gene Symbols (<http://flybase.org>) to avoid confusion between similarly named genes and proteins.

#### *Molecular Cloning of Drosophila cDNA*

A majority of genes (140 out of 202) were cloned from cDNA available from the BDGP and fly genetics community using TOPO TA Cloning into pCR8/GW/TOPO (Invitrogen, K250020). The remaining genes (62) were cloned from *Drosophila* adult and embryonic mRNA using RT-PCR, followed by TOPO TA Cloning. These vectors served as Gateway entry vectors for further cloning into two expression vectors using LR Clonase II (Invitrogen, 11791020), one to express the gene in bait form and the other in prey (Figure S1A and S1B). The expression vectors were built on pMT/BiP/V5 (Invitrogen, V4130-20), which uses a copper-inducible *Drosophila* metallothionein promoter and has the signal sequence of the *Drosophila* BiP protein. For the bait expression vector, we inserted a Gateway Recombination Cassette (Invitrogen, 11828-029), an HRV 3C Protease Site and an Fc tag from human IgG1 between the existing BiP signal sequence and the C-terminal V5 antibody epitope and hexahistidine tags. For the prey expression vector, we inserted a Gateway Recombination Cassette, an HRV 3C Protease Site, a pentameric helical section of the rat COMP protein, and the human placental alkaline

phosphate (AP), but also replaced the V5 antibody epitope with a FLAG antibody epitope.

Overall, we have successfully cloned 195 out of 202 target genes. During RT-PCR, we also fortuitously cloned four extra splice variants (one for Ptp99A, one for Dscam2 and two for Sli), which we included in the Extracellular Interactome collection, raising our collection size to 199. Finally, we included three more extracellular proteins of interest to our research groups, Appl, NetA and NetB, bringing our collection to 202 transcripts in total.

#### *Protein Expression and Western Blotting*

All proteins were expressed in *Drosophila* Schneider 2 (S2) cells in Schneider's medium (Lonza, Walkersville, MD) with 10% Fetal Bovine Serum, 50 units/ml Penicillin, 50 µg/ml Streptomycin, and 2 mM L-Glutamine. S2 cells were transfected transiently using Effectene (QIAGEN, 301425) following manufacturer's notes. Transfected cells were induced for protein expression with 1 mM CuSO<sub>4</sub> 18 hours after transfection, and media were collected three days after induction. Protease inhibitors (Sigma, P8849) and 0.02% NaN<sub>3</sub> were added to collected media before storage at 4°C in 96-deep-well blocks. We have demonstrated that culture medium containing expressed proteins can be stored at 4°C for up to a year without significant degradation of the proteins or change in assay results (data not shown).

Every bait and prey sample produced was run on SDS-PAGE gels, blotted and probed with mouse anti-Penta-His antibody (QIAGEN, 34660) for assessing protein expression. We utilized an Odyssey IR-Fluorescence imaging system (LI-COR) and fluorophore labeled secondary antibodies to quantitate some of the bait and prey samples: Overall, we observed expression as high as ~0.2 µM in conditioned media. The lowest protein concentration we could detect and measure was 0.2 nM, for Vn-AP<sub>5</sub>. Expression for several samples could not be detected (See Table S1).

#### *Extracellular Interaction Assay (ECIA)*



Protein A-coated plates (96-well format, Thermo Fisher Scientific, 15130) were washed with Phosphate-Buffered Saline (PBS) with 0.1% Tween-20, and 100  $\mu$ l of medium containing secreted Fc-fusion proteins (bait) were added overnight at 4°C for bait capture. Protein A plates were then blocked with PBS with 1% Bovine Serum Albumin (BSA) for three hours at room temperature, and washed with PBS with 1 mM CaCl<sub>2</sub>, 1 mM MgCl<sub>2</sub>, and 0.1% BSA. This was followed by incubation with 100  $\mu$ l of medium containing secreted AP<sub>5</sub>-fusion proteins (prey) at room temperature, and another wash. Finally, 100  $\mu$ l of BluePhos Phosphatase Substrate (KPL, 50-88-02) was added to each well. Absorbance at 650 nm was measured at 1 and 2 hours using a VersaMax microplate reader (Molecular Dimensions), and images of these 96-well plates were scanned. We observed linear signal increase for Absorbance values up to 1.9 over the two-hour incubation, above which the signal saturated (data not shown).

The ECIA was performed mostly by hand, assisted by simple liquid handling devices such multi-channel pipettors and 96-well plate dispensers and washers; however, it can be automated for high through put using robotics.

We have included extensive positive and negative controls throughout our experimental setup. Data collected from each 96-well plate contained several negative controls (four mock prey, and *C. elegans* SYG-2 in bait form against Dscam in prey form), and positive controls (*C. elegans* SYG-2 in bait form against *C. elegans* SYG-1 in prey form, and Dscam in bait form against Dscam in prey form) as internal controls. Overall, data for each bait included ten mock prey controls, three negative controls (SYG-2 against Dscam) and six positive controls. Finally, *C. elegans* SYG-2 in bait form and a mock transfection were tested against every prey, serving as two more global negative controls.

The complete set of absorbance results were collated into a data matrix using Perl scripts, and analyzed in MATLAB (MathWorks).

### *Interactome Data Analysis*

Our analysis pipeline included, first, normalizing ECIA measurements by bait (Fc). This produces  $Z$ -scores (standard deviations from mean), and helps normalize against systematically higher values, such as those resulting from longer bait and prey incubations, or for stickiness of baits. One modification we applied to  $Z$ -score calculation was to use *trimmed* means and standard deviations for the calculation of  $Z$ -scores. This was necessary since true positives caused a non-Gaussian distribution of ECIA measurements and inflate means and standard deviations. This, in turn, had led to many true positives being classified as non-interactors, especially for proteins with very strong and numerous interactions. Note that we are not excluding any data: we are only removing extreme values from the calculation of certain overall statistics, but using all data to complete the analysis. We chose to generate statistics by trimming all values that are clear outliers by using low and high cutoffs. The values of these cutoffs were empirically determined based on the observed distribution of all assay results. This resulted in exclusion of an average of only 3.6 (2%) (median = 2 [1%]) data points per bait from the calculation of trimmed statistics.

- The need for trimmed statistics can be demonstrated with the hub molecule CG10824 (Common DIP, DIPc). If  $Z$ -scores are calculated with *untrimmed* mean and standard deviations, we misleadingly observe zero prey that interact with CG10824-Fc at  $Z > 10$  (max  $Z$  is 7.2). However, using *trimmed* statistics, we have 22 prey molecules that interact with CG10824-Fc at  $Z > 10$  (max  $Z$  is 697), which is correctly indicative of CG10824's interactions.

The data matrix, which had now bait-normalized  $Z$ -scores, was normalized along the prey axis. This accounted for “sticky” prey proteins, and was crucial in removing non-specific interactions.

- The need for normalization along the prey axis can be demonstrated with the “sticky” prey Dpr8-AP<sub>5</sub>. Out of 202 bait samples (Fc molecules) tested against Dpr8-AP<sub>5</sub>, 122 have  $Z_{\text{bait-normalized}} > 10$ , clearly an anomaly. After normalization along the prey, that number was down to four, three of which were DIPs or DIPc.

In the next step, the symmetric nature of our data, i.e. the bait-prey swapping, was used to eliminate interactions that only appeared in one orientation. We experimented with three methods: (1)  $Z > 10$  and  $Z_{\text{swapped}} > 10$ , (2) Stouffer's  $Z > 10$ , and (3)  $(Z * Z_{\text{swapped}})^{-1} > 10$ . Of these, the first method of requiring both orientation to have Z-scores above 10 proved too restrictive, as it eliminated interactions such as Vein-Boi, where the protein quantities limited signal strength especially in one orientation (such as in Boi-Fc vs. Vein-AP<sub>5</sub>), but the interactions were genuine. The statistically rigorous Stouffer's proved to be too lax, allowing too many interactions, while not increasing the number of interactions we deemed likely or proven. Finally, the geometric mean of Z's,  $(Z * Z_{\text{swapped}})^{-1}$ , appeared to be a conservative but still sensitive statistic, and was chosen.

In the last step of analysis, all interactions with  $(Z * Z_{\text{swapped}})^{-1} > 10$  were investigated in the scanned images for confirmation. A limited number of interactions (12 in total) where  $10 < (Z * Z_{\text{swapped}})^{-1} < 25$  were considered low confidence and removed, since they involved sticky proteins, proteins that did not express appreciably, or scanned images of assay plates did not visually indicate a color change. We also realized that the prey normalization step, which was crucial for removing sticky proteins, also decreased Z-scores for several interactions of the Dpr/DIP/DIPc interaction network; we manually investigated our results, and added clear interactions from this class to our list of positives. As the final confirmation, all the remaining interactions, deemed as 'hits', were repeated with ECIA in both bait-prey orientations, using new batches of expression media for bait and prey. All were successfully reproduced.

#### *ECIA Data: Internal Consistency and Reproducibility*

Our assay setup includes an inherent control for internal consistency, which is that swapped bait-prey experiments should give non-identical, but similar results. We actually make use of this consistency by calculating the geometric mean of the Z-scores of the swapped pairs, and hence eliminating interactions that did not occur in both bait-prey orientations. The numerical values of the original Absorbance(650 nm) measurements or the Z-scores for the bait/prey-swapped data points are not expected to be identical, since these are mostly determined by protein expression levels of bait and prey. However, we

still observed strong Pearson Correlation Coefficients (CC) of 0.78 and 0.72 for the two interactome datasets for Absorbance(650 nm) values.

We have also assessed the reproducibility of our results. We performed two very large interactomes, first for the IgSF only and second for the complete collection, which included the IgSF. There is a close match between the common parts of the two, which can be visually assessed in Figure S2A vs. Figure S2B, green triangle. The Pearson Correlation Coefficients between the two datasets is 0.86. This high correlation is despite the fact that the interactomes were performed with independently produced protein samples, and the assay results are strongly affected by the variable protein expression levels. Another way to assess the reproducibility is tabulating the interactions observed in both interactomes: The strongly observed 22 interactions (ECIA scores > 100) of the smaller Interactome were all observed in the second interactome, while out of all the 62 interactions observed in the smaller Interactome, 54 were also above our statistical significance cutoff in the larger Interactome. Of the remaining eight, all of them were observed in the second Interactome in at least one orientation at  $7\sigma$  or above, but failed to pass our stringent statistical limit. Both the correlation statistics and the match between the lists of detected interactions indicate excellent reproducibility of the assay. The fact that all detected interactions could later be reproduced also reinforces this point.

#### *Other Properties of the ECIA data*

We have observed that several proteins, especially prey, produced systematically higher absorbance values, a consequence of protein “stickiness”. In our data, we are able to distinguish between sticky proteins and interaction hubs, as sticky proteins (such as Dpr8-AP<sub>5</sub>) have elevated background levels, but interaction hubs (such as CG10824-AP<sub>5</sub>) do not. This can be observed in Figure 4B, which has ECIA measurements for sticky Dpr8-AP<sub>5</sub> against many baits, all of which have elevated levels, with only CG42343 and CG10824 (DIPc) significantly standing out as true interactions. However, the interaction hub CG10824-AP<sub>5</sub> in Figure 4A has average background levels for proteins it does not interact with, while having many strong measurements for its true interactors.

We looked into possible reasons for stickiness of certain proteins. We have not been able to find any biophysical property (such as molecular weight, charge, isoelectric point or hydrophobicity) that is shared between sticky proteins. Therefore, we believe most stickiness to result from the S2 strain in producing certain ECDs heterogeneously, where a fraction of the sample is not properly folded.

We also performed titrations of the ECIA by diluting the bait and prey samples for six selected interactions (Figure S1C-G). The fact that the strength of the binding signal is determined by the concentration of the interaction partner in lower abundance, regardless of bait/prey orientation, indicates that the observed signal is the result of specific binding. Furthermore, the binding data fit to single-site binding curves demonstrate that the effective affinity of pentameric prey are stronger by 20 fold (Dpr6-CG32791) to 70,000 fold (Vn-Boi) compared to monomeric proteins (Figure S1G, compare with Figure 4D).

We also observed very weak or no expression for 13% of target proteins. These lead to false negatives in our interactome, in two prominent axon guidance complexes, Robo–Slit and Netrin-A–Unc-5. These false negatives result from poor expression of Slit and Netrin-A, respectively. In the case of the missing Netrin-A–Unc-5 interaction, we are able to observe the very closely related Netrin-B–Unc-5 complex. This was probably due to the a subcloning defect that resulted in expression of a truncated version of Netrin-B, lacking its charged and sticky C-terminal tail, resulting in improved in-solution behavior (our unpublished observations) for the still weakly expressing Netrin-B. The Netrin-A ECD constructs contained the problematic C-terminal end.

Finally, it should be noted that ECIA might be less likely to detect homophilic interactions. Through oligomerization, we may be favoring homophilic interactions within the prey oligomer, making the prey unavailable for interacting with the bait. This is an especially acute problem if the homophilic molecules interact in *cis*, where proteins align side by side. We do not know how much this contributes to our false negative rate, but it is clearly not greatly detrimental, as we report homophilic interactions for 10% of our proteins. Based on our database and literature survey of the proteins in this study

(Table S2), ECIA has been able to detect 16 out of 24 known homophilic interactions (67%).

#### *Definition of the DIP and Side families*

For the Side family, we chose to follow Zinn, 2009, which defined it as a family of eight closely related proteins (Figure S3B). This is despite the fact that we did not observe interactions for four of these proteins (Figure 3B). However, we also did not observe interactions for seven of the fourteen members of the Beat family, and it is likely that lack of functional expression of any of these Side and Beat family members is the explanation for this lack of apparent binding partners.

For the DIP family, we have seen Dpr-interactions with eight proteins (Figure 3A) that meet the general sequence features (Figures S3D and S3E) of the DIP family. We have added CG11320 to the list of DIPs, which is a close paralog of the DIPs CG14010 and CG31646, and could not be expressed due to a mistake in our cloning that resulted in inclusion of its transmembrane helix in the secretion construct (See Table S1 for details). Two more proteins, CG31814 and CG40378, also displayed significant sequence similarity to DIPs and shared overall DIP features. However, these two were successfully expressed. We include these two as putative DIPs, and suggest that lack of Dpr-interactors for them might be the result of lack of expression of their Dpr partners. Dpr4 and Dpr15 do not express appreciably and therefore might be potential interactors of CG11320, CG31814, and CG40378.

In addition to these, we observed the recently discovered gene CG42596 to be closely related to Dprs, constituting a possible “Dpr21”. This gene was not annotated at the time of our cloning, and therefore, we did not include it in our Interactome screen.

#### *Analysis of Previous Large-Scale Interactome Data*

For all genes included in our list, we have analyzed all large-scale interactome datasets deposited to the DroID database using Cytoscape version 2.8.3 (Shannon et al., 2003; Smoot et al., 2011) and the DroID plugin version 1.5 with the April 2012 release (data

version 2012\_04) of DroID. We also parsed Supplemental Table 3 from Guruharsha et al., 2011 for complete DPiM data. All interactions reported for our gene collection by previous large-scale interactomes are tabulated Supplementary Table 3. None of these interactions are within our list of observed interactions. Only one interaction reported by DPiM for the protein ImpL2, with Ilp2 – a protein that was not studied by us since it has no Ig, FnIII or LRR domains, is independently reported in the literature (Honegger et al., 2008) (Table S4, yellow row). Interestingly, this interaction is between two secreted proteins, not cell surface proteins, and is therefore not affected by some of the pitfalls others and we report for the established interactome methodologies.

Within the large-scale experimental DroID data, when all significance filters were removed and all interactions were filtered for having as both interactors IgSF, FnIII and LRR proteins, there were seven interactions observed: five were from DPiM and two were from the Finley Lab Y2H (Table S4, white rows). Two of these interactions, both from DPiM, were either observed in our Extracellular Interactome or are plausible; however, neither of these passed the significance score used by the authors of their study, and therefore do not count as *bona fide* discoveries.

We have also searched published literature for all extracellular interactions of the proteins included in our interactome. Results are tabulated in Table S1 next to relevant proteins in column T, and in Table S2.

#### *Baculoviral Expression, Protein Purification, Gel Filtration Chromatography and SPR*

For biophysical studies, extracellular domains for proteins of interest were further cloned into the baculovirus transfer vector pAcGP67A (BD Biosciences, 554756) with C-terminal hexahistidine tags. Baculoviruses were produced in Sf9 cells using BaculoGold linearized baculovirus DNA (BD Biosciences, 552846) and Cellfectin II (Invitrogen, 10362-100). Protein expression was done in High Five cells at 27°C for 48 to 66 hours, depending on the degradation sensitivity of the protein expressed. Proteins were then purified over Nickel-Nitrilotriacetic acid (Ni-NTA) Agarose (QIAGEN, 30250) columns

and with gel filtration chromatography, using Superdex 200 columns (GE Healthcare), in 10 mM HEPES pH 7.2, 150 mM NaCl.

For Surface Plasmon Resonance experiments, expression plasmids were designed to have an Avi-tag C-terminal to the protein of interest but N-terminal to the hexahistidine tag. High Five cells were co-transfected with baculoviruses for the Avi-tagged protein of interest and the biotin ligase BirA (secreted) in the presence of 100  $\mu$ M D-Biotin for in-culture biotinylation. These C-terminally biotinylated proteins were used as ligands (stationary phase) in SPR experiments, while biotin-free samples were used as analytes (mobile phase). Biacore experiments were performed with a Biacore T100 (GE Healthcare) at 25°C using SA (Streptavidin-coupled Carboxymethyl Dextran) chips. In most cases, 10 mM HEPES pH 7.2, 150 mM NaCl, 1% BSA, and 0.05% Polysorbate-20 was used as the mobile phase buffer. Dissociation constants ( $K_d$ ) were calculated by fitting Langmuir isotherms to steady state responses, and kinetic constants ( $k_{on}$ ,  $k_{off}$ ) were calculated by fitting the complete response curves. In many cases, fast kinetics of binding prevented us from acquiring reliable kinetics values, but equilibrium parameters (dissociation constants) were accurately collected. In the case for the Unc-5–SNS interaction, where we attempted to measure a very weak affinity (with  $K_D \sim 0.5$  mM) and full saturation of the surface with analyte could not be achieved, we predicted maximum response units ( $R_{max}$ ) based on response units captured of the ligand on the SPR chip surface, and used the predicted  $R_{max}$  in fitting our results for an approximate  $K_D$ .

Among the SPR-validated interactions we confirmed were those of Dpr6 against the DIP CG32791, and the common DIP CG10824. Curiously, CG32791 is one of the few Dpr/DIPs that did not bind the common DIP. Our SPR results have confirmed that CG32791 and CG10824 do not interact appreciably ( $K_d \gg 30$   $\mu$ M, data not shown).

#### *In Vivo Staining of Drosophila Embryos*

Staining of live-dissected stage 16 *Drosophila* embryos with AP<sub>5</sub> fusion proteins was done as previously described in Fox and Zinn, 2005, and Lee et al., 2009. Supernatants from S2 cell culture containing the AP<sub>5</sub> fusion proteins were concentrated 5-fold in



Amicon Ultra-4 Centrifugal Filter Units (100 kDa cutoff), and these concentrates were used directly for staining. Following incubation with AP<sub>5</sub> fusion proteins, embryos were fixed, and labeled with antibodies. The primary antibodies used were rabbit anti-AP (Serotec) at 1:500 and mAb 1D4 (anti-Fas2) at 1:3. The secondary antibodies were Alexa-Fluor anti-mouse 568 and Alexa-Fluor anti-rabbit 488, both at 1:1000. Imaging was performed on a Zeiss Axioplan microscope with a 40 x water-immersion objective. The deficiency used to remove the *CG14521* gene in the experiment of Figure 7 is *Df(3R)Exel6210*. Overexpression of CG14521 in muscles (Figure 7F) was achieved by combining a UAS-containing insertion upstream of the gene with the muscle-specific 24B-GAL4 driver.

### Supplemental References

- Bendtsen, J.D., Nielsen, H., Von Heijne, G., and Brunak, S. (2004). Improved prediction of signal peptides: SignalP 3.0. *J. Mol. Biol.* *340*, 783–795.
- Dolan, J., Walshe, K., Alsbury, S., Hokamp, K., O’Keefe, S., Okafuji, T., Miller, S.F.C., Tear, G., and Mitchell, K.J. (2007). The extracellular leucine-rich repeat superfamily; a comparative survey and analysis of evolutionary relationships and expression patterns. *BMC Genomics* *8*, 320.
- Eisenhaber, B., Bork, P., and Eisenhaber, F. (1999). Prediction of potential GPI-modification sites in proprotein sequences. *J. Mol. Biol.* *292*, 741–758.
- Eswar, N., Webb, B., Marti-Renom, M.A., Madhusudhan, M.S., Eramian, D., Shen, M.-Y., Pieper, U., and Sali, A. (2006). Comparative protein structure modeling using Modeller. *Curr Protoc Bioinformatics Chapter 5*, Unit 5.6.
- Fox, A.N., and Zinn, K. (2005). The heparan sulfate proteoglycan syndecan is an in vivo ligand for the *Drosophila* LAR receptor tyrosine phosphatase. *Curr. Biol.* *15*, 1701–1711.
- Gouy, M., Guindon, S., and Gascuel, O. (2010). SeaView version 4: A multiplatform graphical user interface for sequence alignment and phylogenetic tree building. *Mol. Biol. Evol.* *27*, 221–224.
- Guruharsha, K.G., Rual, J.-F., Zhai, B., Mintseris, J., Vaidya, P., Vaidya, N., Beekman, C., Wong, C., Rhee, D.Y., Cenaj, O., et al. (2011). A Protein Complex Network of *Drosophila melanogaster*. *Cell* *147*, 690–703.
- Han, M.V., and Zmasek, C.M. (2009). phyloXML: XML for evolutionary biology and comparative genomics. *BMC Bioinformatics* *10*, 356.

Honegger, B., Galic, M., Köhler, K., Wittwer, F., Brogiolo, W., Hafen, E., and Stocker, H. (2008). Imp-L2, a putative homolog of vertebrate IGF-binding protein 7, counteracts insulin signaling in *Drosophila* and is essential for starvation resistance. *J. Biol.* *7*, 10.

Hunter, S., Apweiler, R., Attwood, T.K., Bairoch, A., Bateman, A., Binns, D., Bork, P., Das, U., Daugherty, L., Duquenne, L., et al. (2009). InterPro: the integrative protein signature database. *Nucleic Acids Res.* *37*, D211–215.

Hunter, S., Jones, P., Mitchell, A., Apweiler, R., Attwood, T.K., Bateman, A., Bernard, T., Binns, D., Bork, P., Burge, S., et al. (2012). InterPro in 2011: new developments in the family and domain prediction database. *Nucleic Acids Res.* *40*, D306–312.

Hynes, R.O., and Zhao, Q. (2000). The evolution of cell adhesion. *J. Cell Biol.* *150*, F89–96.

Käll, L., Krogh, A., and Sonnhammer, E.L.L. (2007). Advantages of combined transmembrane topology and signal peptide prediction--the Phobius web server. *Nucleic Acids Res.* *35*, W429–432.

Kelley, L.A., and Sternberg, M.J.E. (2009). Protein structure prediction on the Web: a case study using the Phyre server. *Nat Protoc.* *4*, 363–371.

Krogh, A., Larsson, B., Von Heijne, G., and Sonnhammer, E.L. (2001). Predicting transmembrane protein topology with a hidden Markov model: application to complete genomes. *J. Mol. Biol.* *305*, 567–580.

Kurusu, M., Cording, A., Taniguchi, M., Menon, K., Suzuki, E., and Zinn, K. (2008). A screen of cell-surface molecules identifies leucine-rich repeat proteins as key mediators of synaptic target selection. *Neuron* *59*, 972–985.

Lee, H.-K.P., Wright, A.P., and Zinn, K. (2009). Live dissection of *Drosophila* embryos: streamlined methods for screening mutant collections by antibody staining. *J Vis Exp.*

Letunic, I., Doerks, T., and Bork, P. (2012). SMART 7: recent updates to the protein domain annotation resource. *Nucleic Acids Res.* *40*, D302–305.

Punta, M., Coghill, P.C., Eberhardt, R.Y., Mistry, J., Tate, J., Boursnell, C., Pang, N., Forslund, K., Ceric, G., Clements, J., et al. (2012). The Pfam protein families database. *Nucleic Acids Res.* *40*, D290–301.

Shannon, P., Markiel, A., Ozier, O., Baliga, N.S., Wang, J.T., Ramage, D., Amin, N., Schwikowski, B., and Ideker, T. (2003). Cytoscape: a software environment for integrated models of biomolecular interaction networks. *Genome Res.* *13*, 2498–2504.

Sievers, F., Wilm, A., Dineen, D., Gibson, T.J., Karplus, K., Li, W., Lopez, R., McWilliam, H., Remmert, M., Söding, J., et al. (2011). Fast, scalable generation of high-quality protein multiple sequence alignments using Clustal Omega. *Mol. Syst. Biol.* *7*, 539.

Smoot, M.E., Ono, K., Ruscheinski, J., Wang, P.-L., and Ideker, T. (2011). Cytoscape 2.8: new features for data integration and network visualization. *Bioinformatics* 27, 431–432.

Vogel, C., Teichmann, S.A., and Chothia, C. (2003). The immunoglobulin superfamily in *Drosophila melanogaster* and *Caenorhabditis elegans* and the evolution of complexity. *Development* 130, 6317–6328.

Wilson, D., Pethica, R., Zhou, Y., Talbot, C., Vogel, C., Madera, M., Chothia, C., and Gough, J. (2009). SUPERFAMILY--sophisticated comparative genomics, data mining, visualization and phylogeny. *Nucleic Acids Res.* 37, D380–386.

Zhong, J., Zhang, H., Stanyon, C.A., Tromp, G., and Finley, R.L., Jr (2003). A strategy for constructing large protein interaction maps using the yeast two-hybrid system: regulated expression arrays and two-phase mating. *Genome Res.* 13, 2691–2699.

Zinn, K. (2009). Choosing the road less traveled by: a ligand-receptor system that controls target recognition by *Drosophila* motor axons. *Genes Dev* 23, 1042–1045.

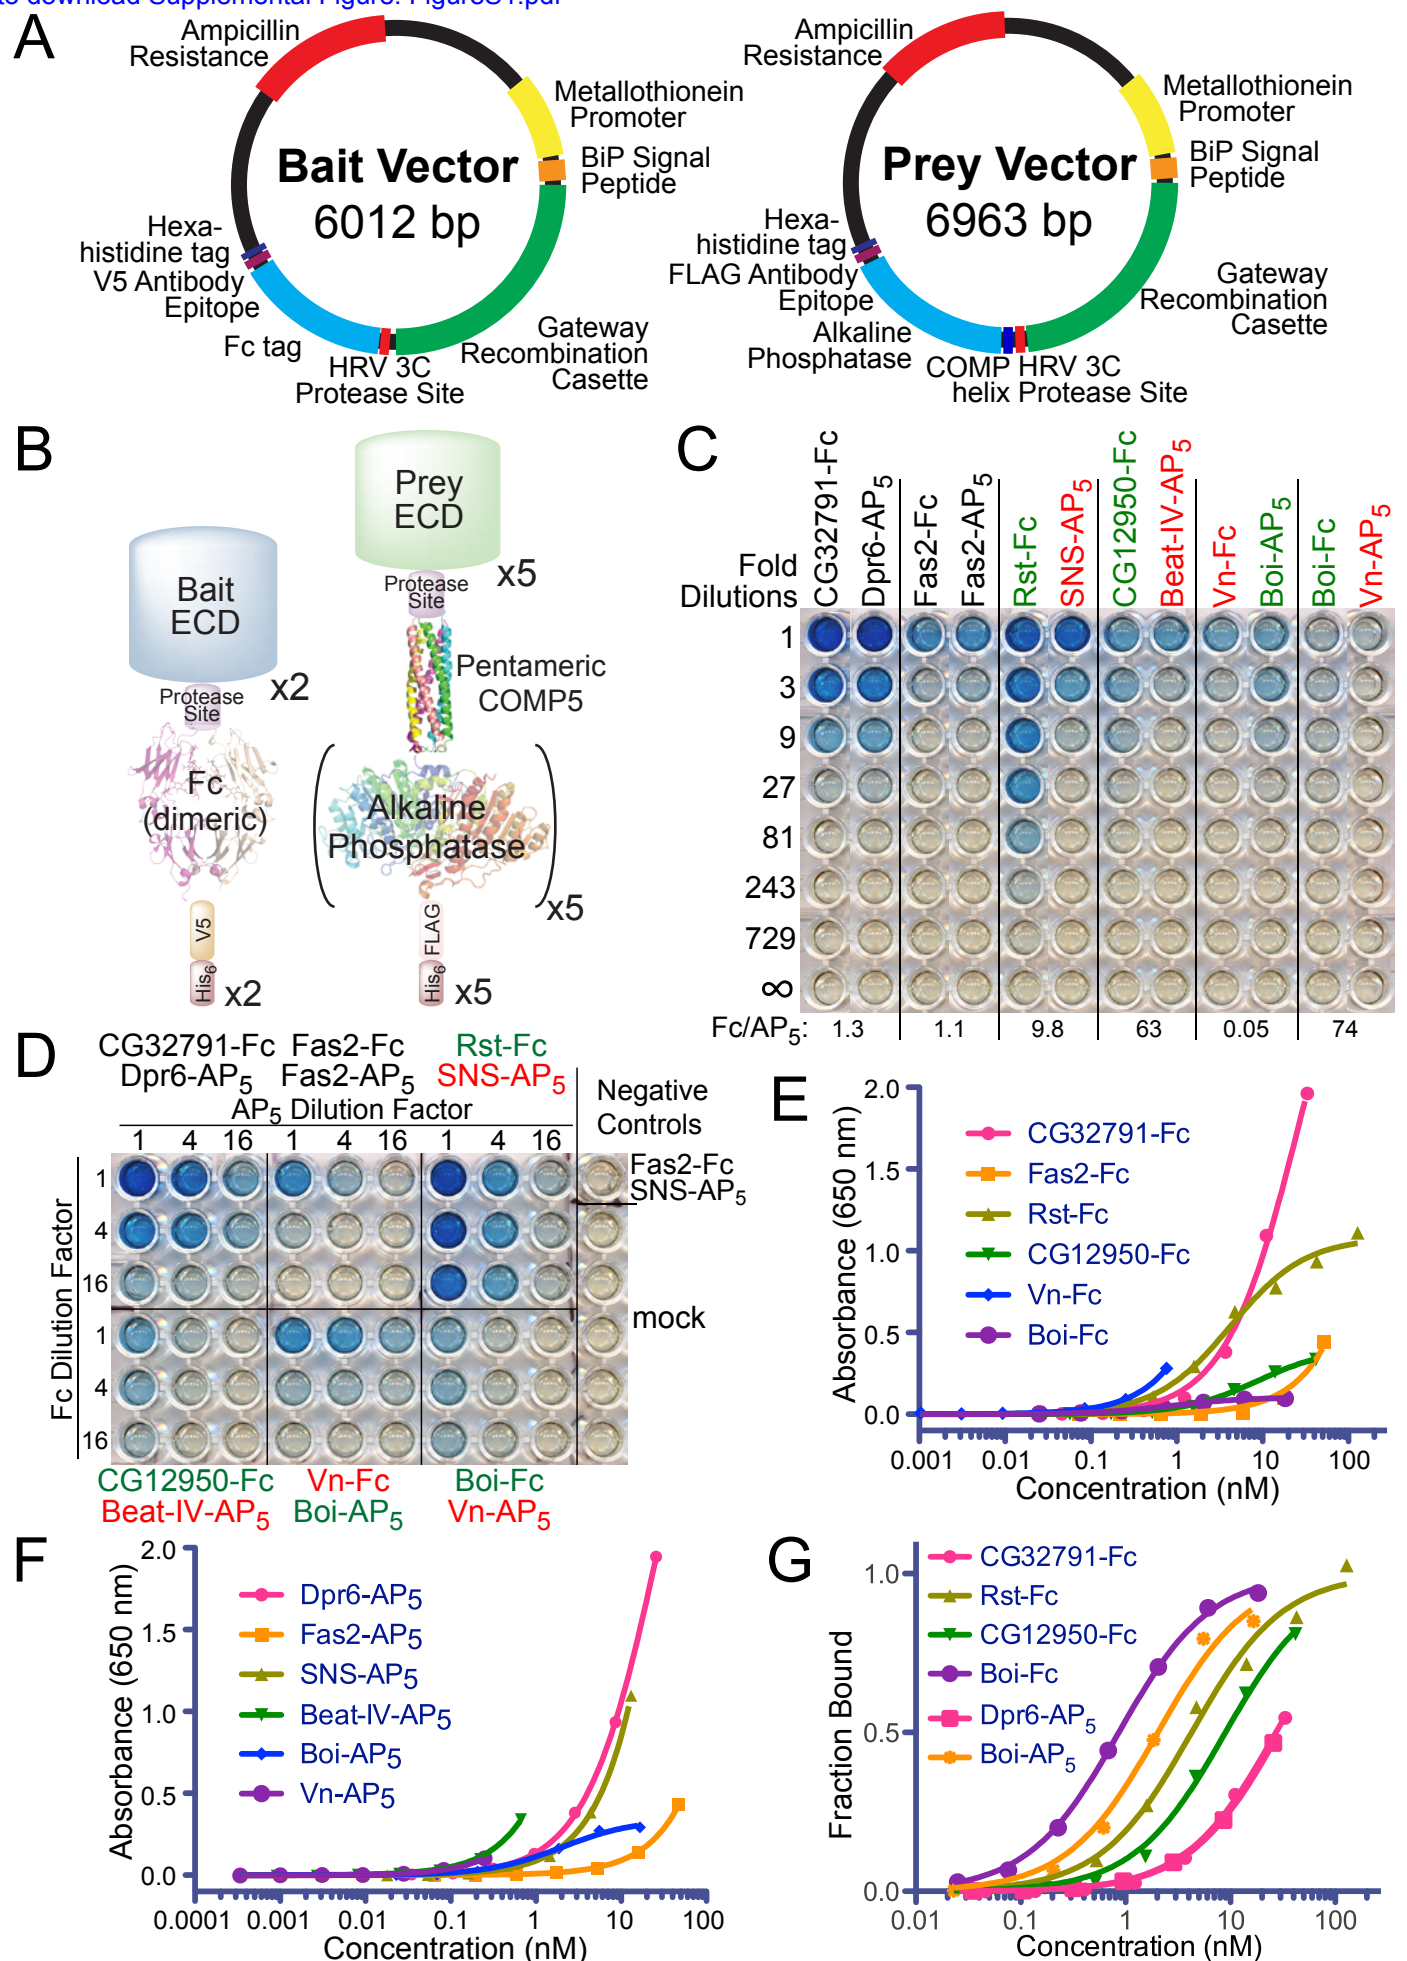

**Figure S1**, related to Figure 1. **The Extracellular Interactome Assay.** See text for details.

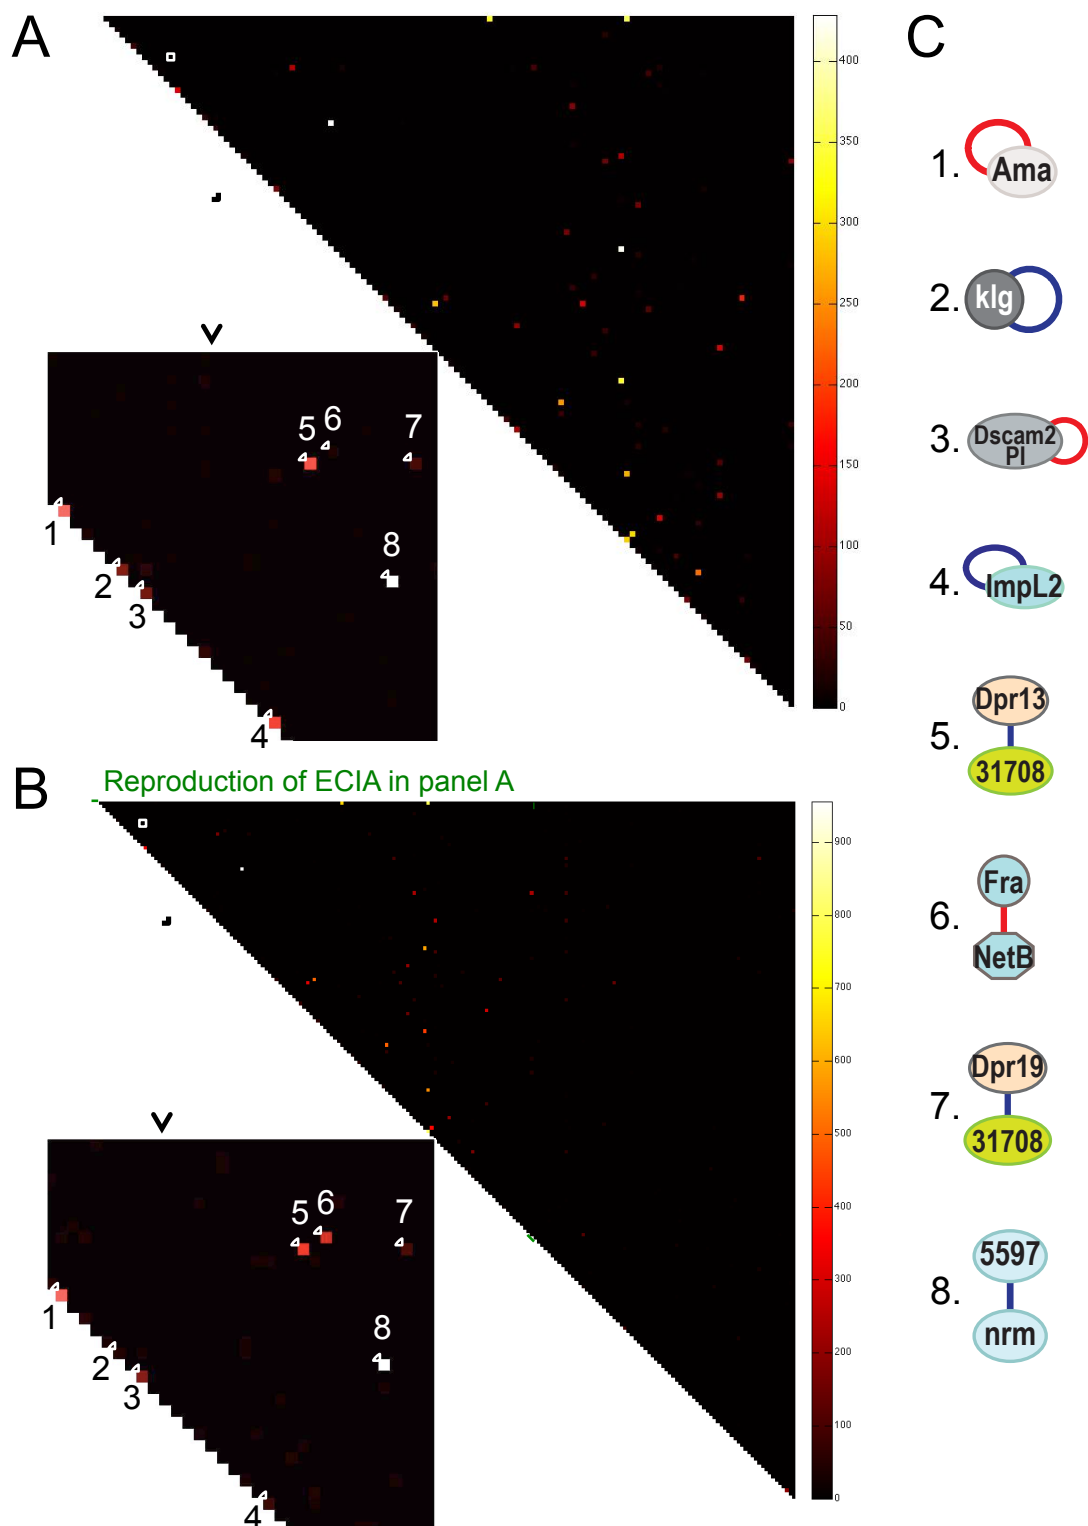

**Figure S2**, related to Figure 2. **Normalized ECIA Data.** Matrices (half squares) contain final ECIA scores (See Extended Experimental Protocols) for each interaction on a black to white scale, going left to right and top to bottom in the order of internal sample numbers used in this study (Table S1, column A), for **(A)** the Extracellular Interactome Assay of the *Drosophila* IgSF, and **(B)** the Extracellular Interactome Assay of the IgSF, FnIII and LRR. The data within the green triangle is a reproduction of the IgSF-only Interactome in (A), and closely matches it. Insets in A and B show eight interactions, denoted in (C), out of which, seven were observed in either of the ECIA. Visual comparison of positives between A and B demonstrates the reproducibility the ECIA at large scale.

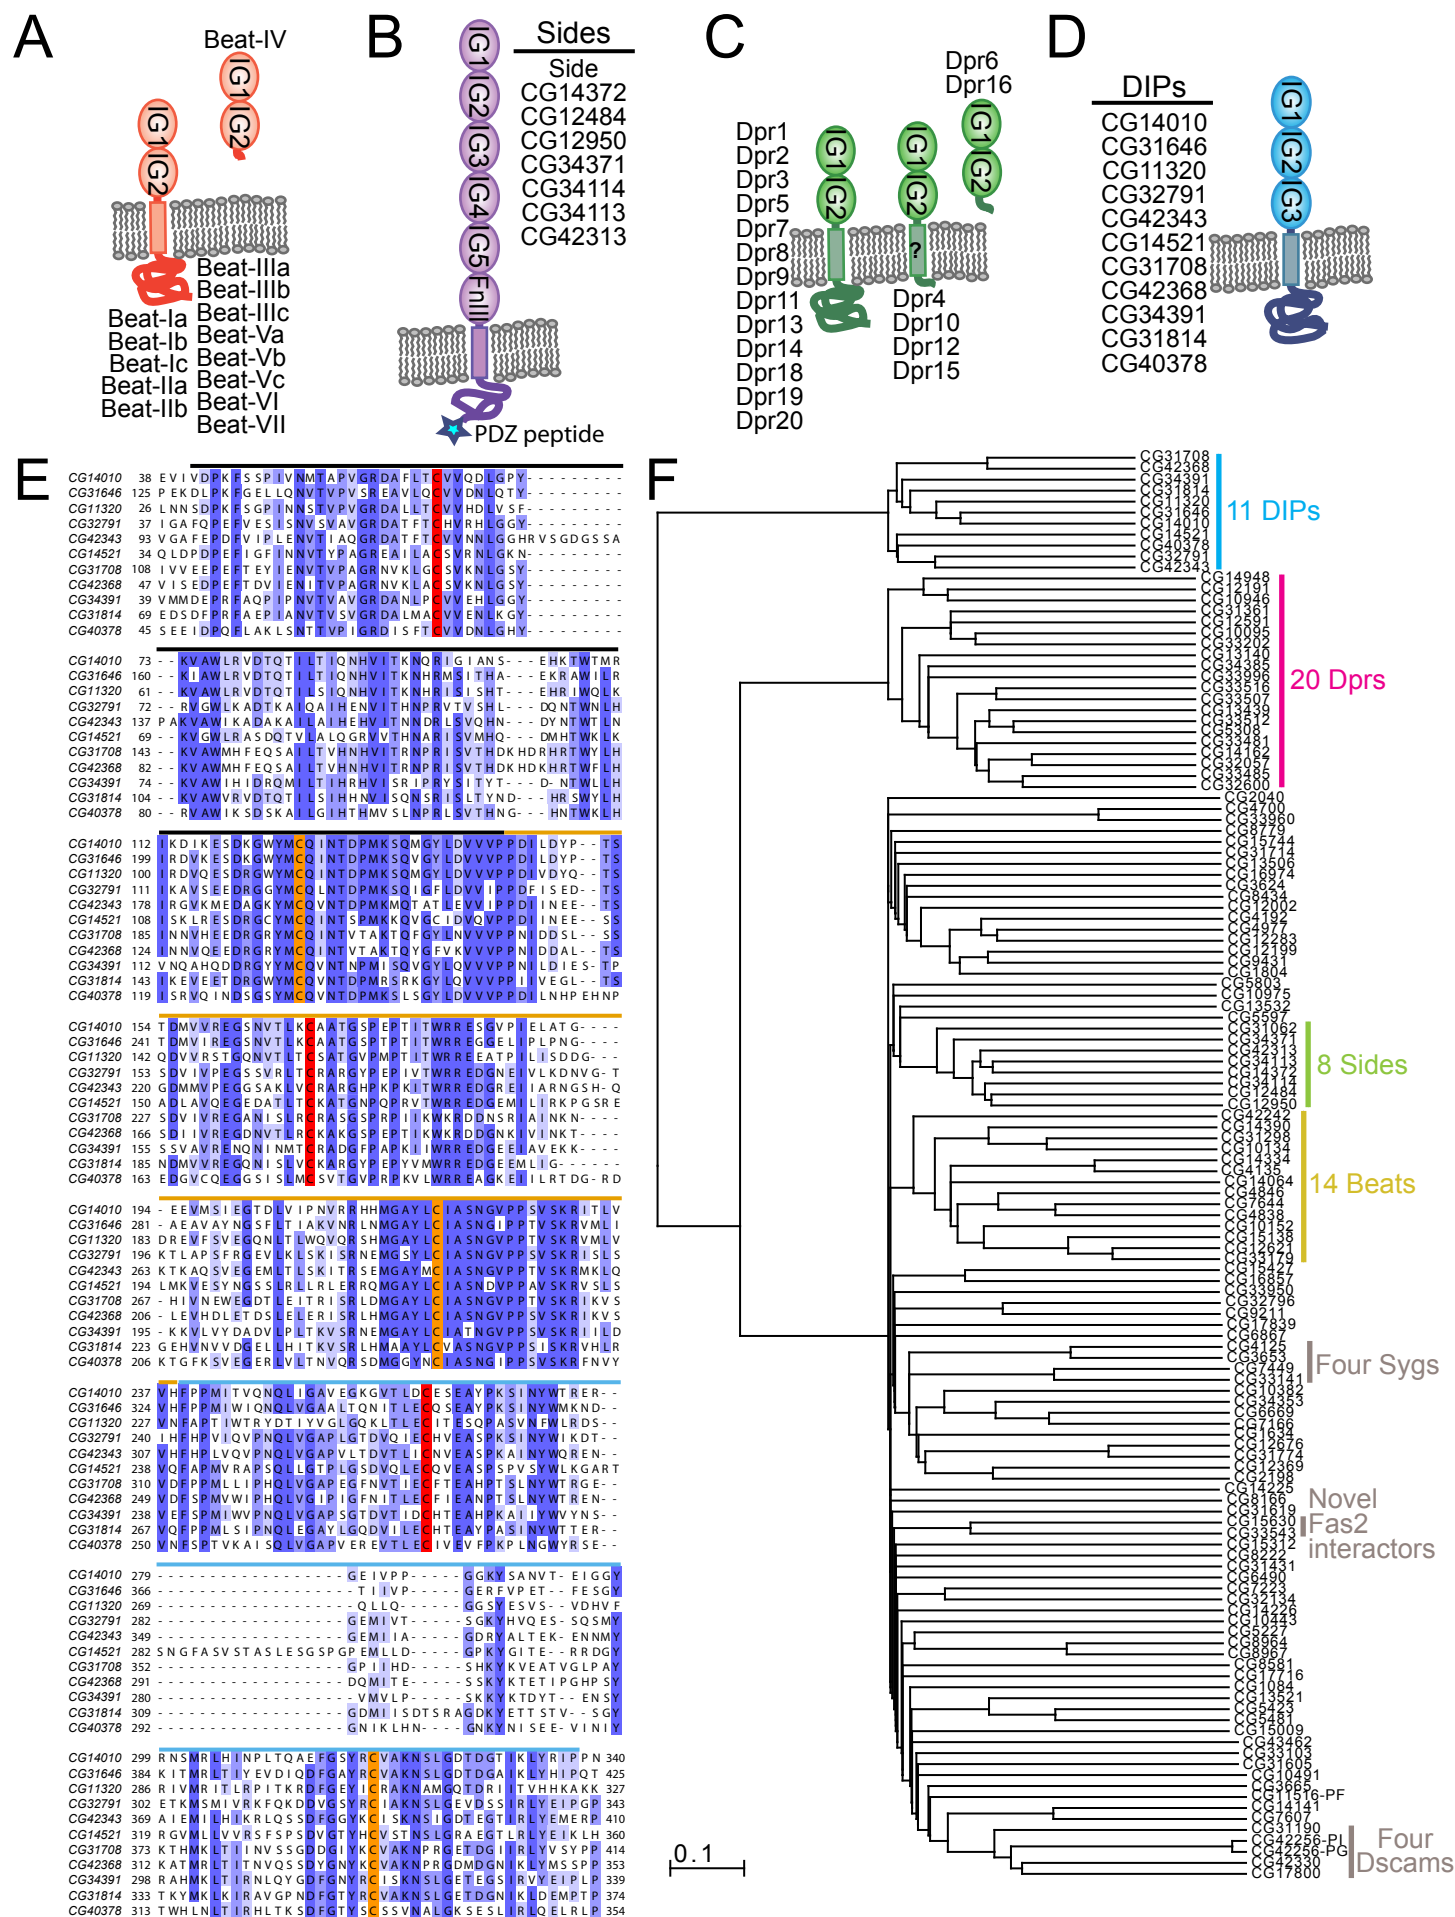

Figure S3, related to Figure 4. The four IgSF subfamilies of *Drosophila*. See text for legend.

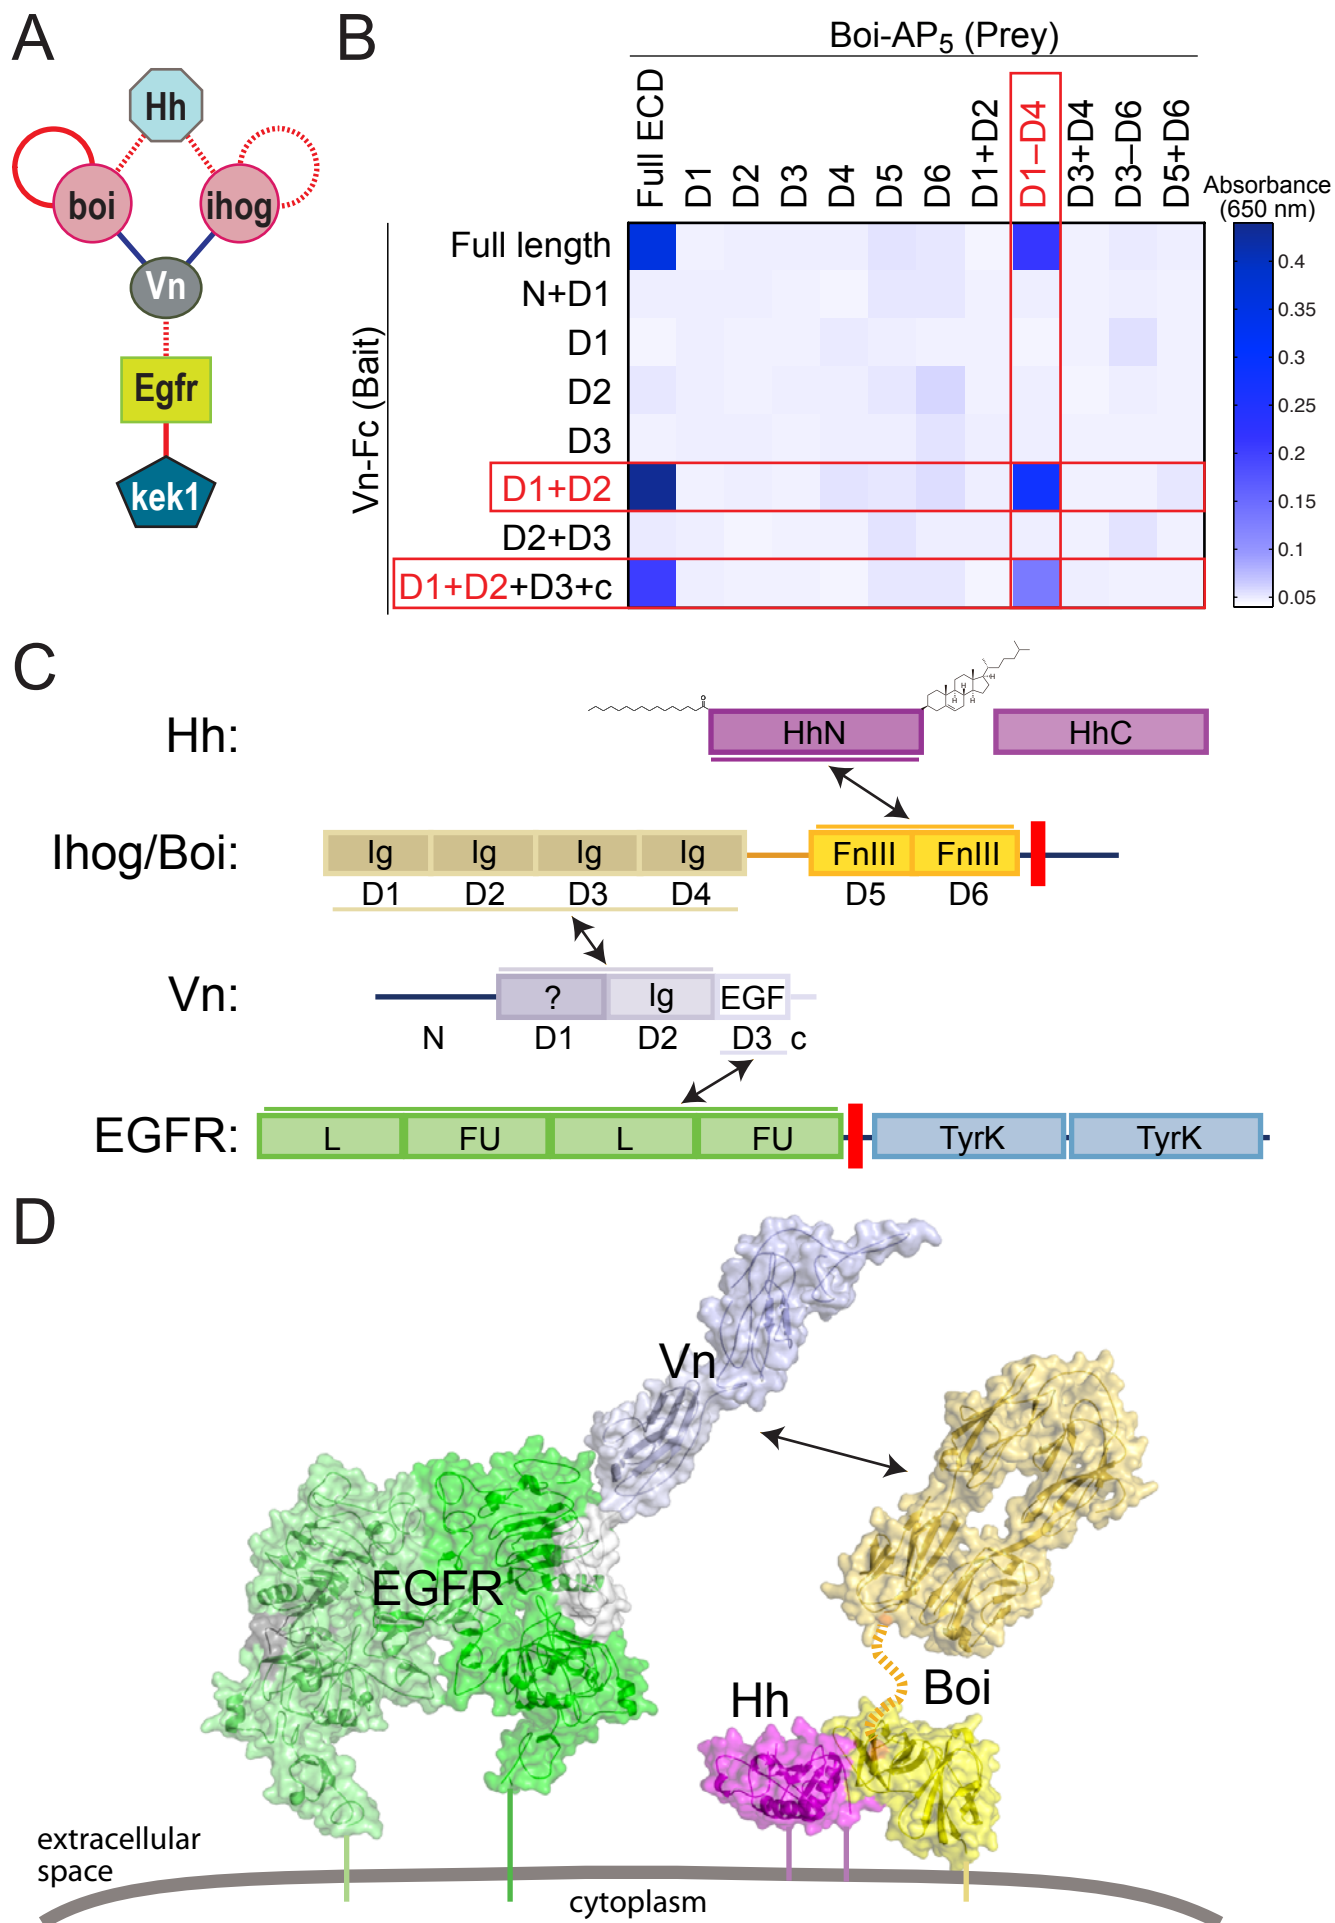

**Figure S4, related to Figure 3. The EGF and Hh Signaling Pathways Intersect.**

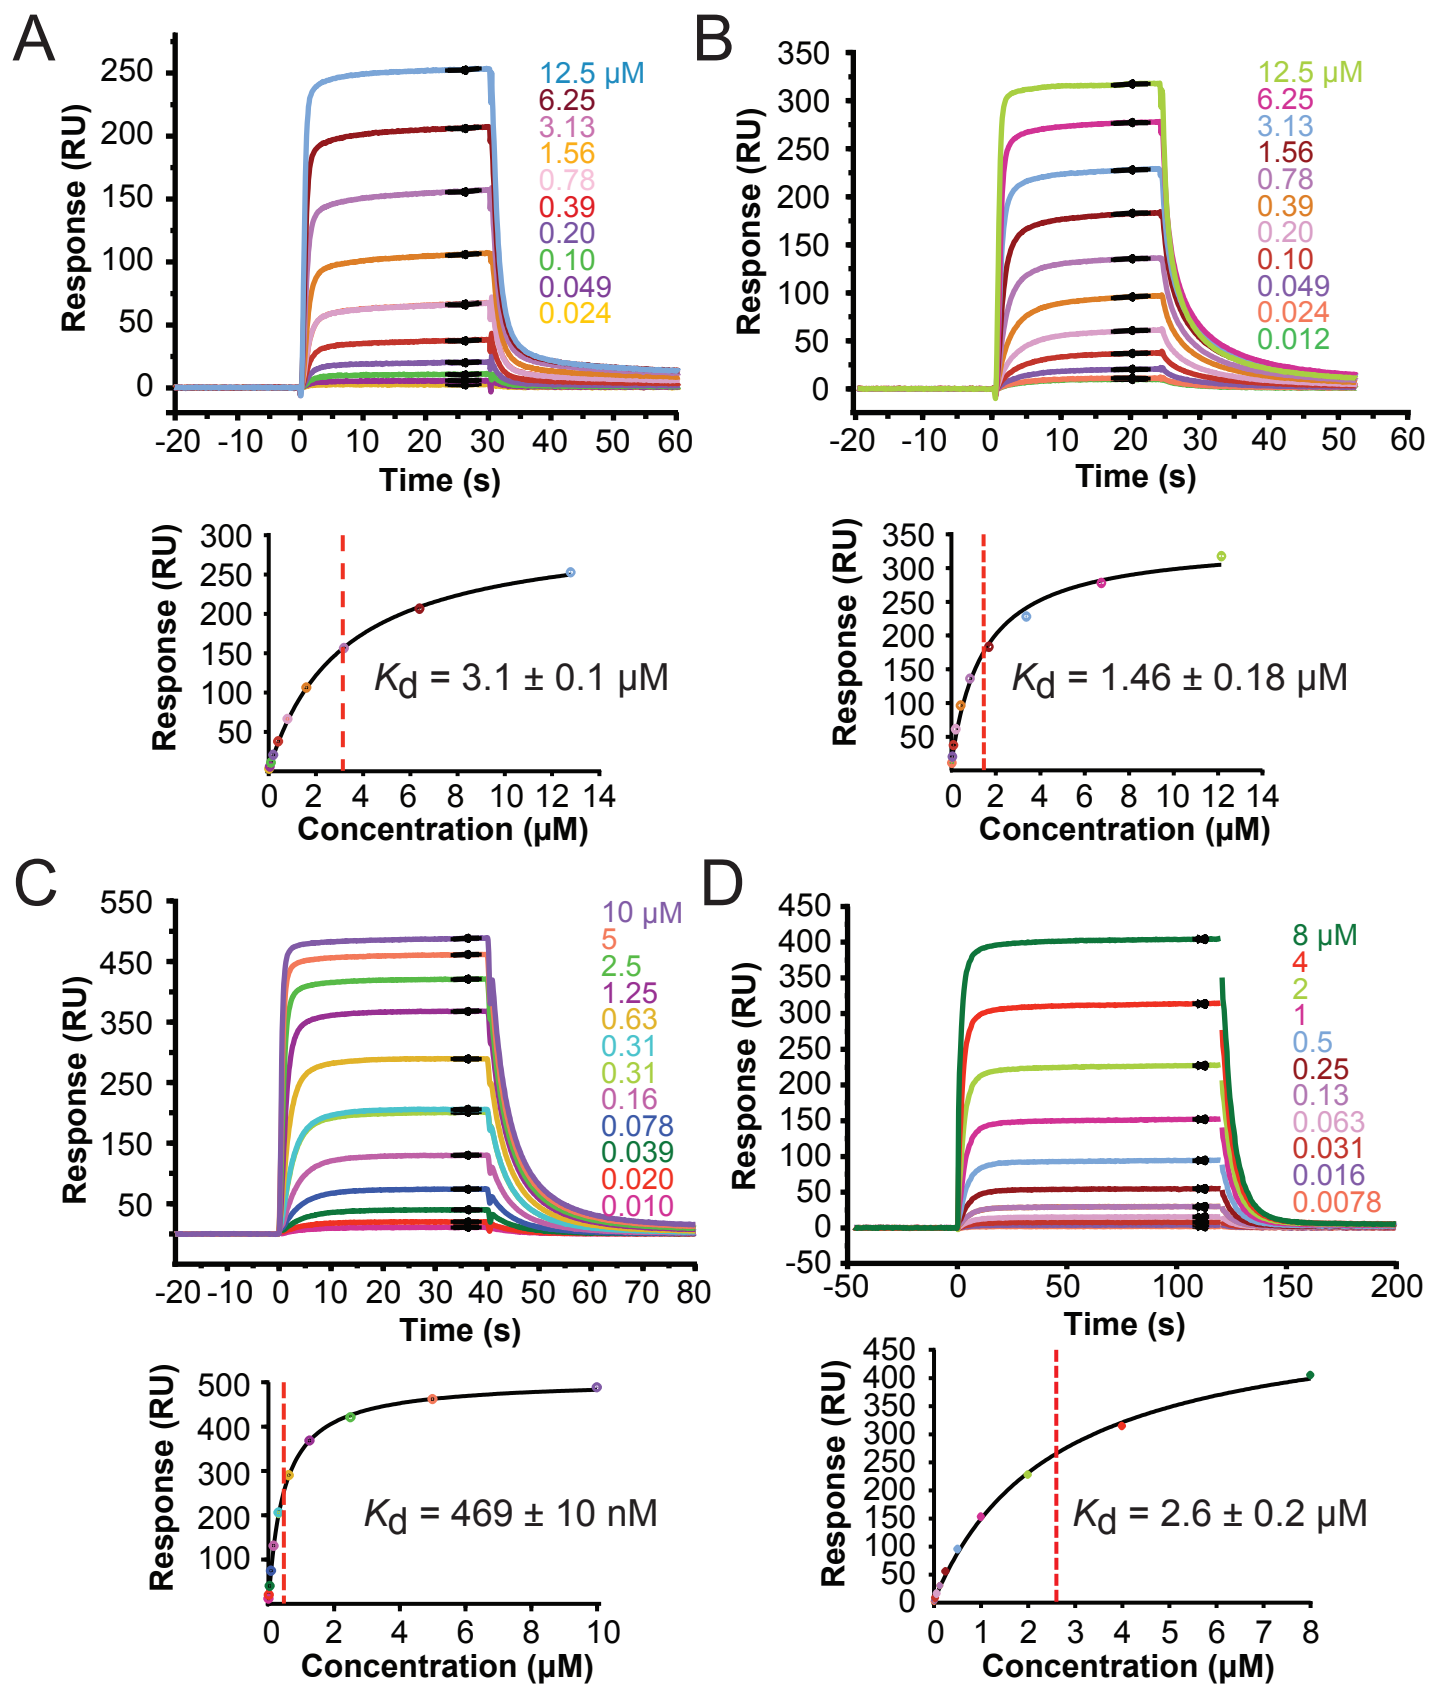

**Figure S5**, related to Figure 4. **Surface Plasmon Resonance** sensorgrams (top) and binding isotherms (bottom) for (A) CG12950 (stationary phase) and BeatIV (mobile phase), (B) CG12950 (stationary) and BeatIV (mobile), (C) Dpr6 (stationary) and CG32791 (mobile), (D) Vein (stationary) and Boi (mobile). Equilibrium binding responses are fit successfully to Langmuir isotherms. Each color in the binding sensorgrams represent the concentration of the analyte in mobile phase. The color scheme is preserved in the binding isotherms below. Zero-second timepoint indicates analyte injection.



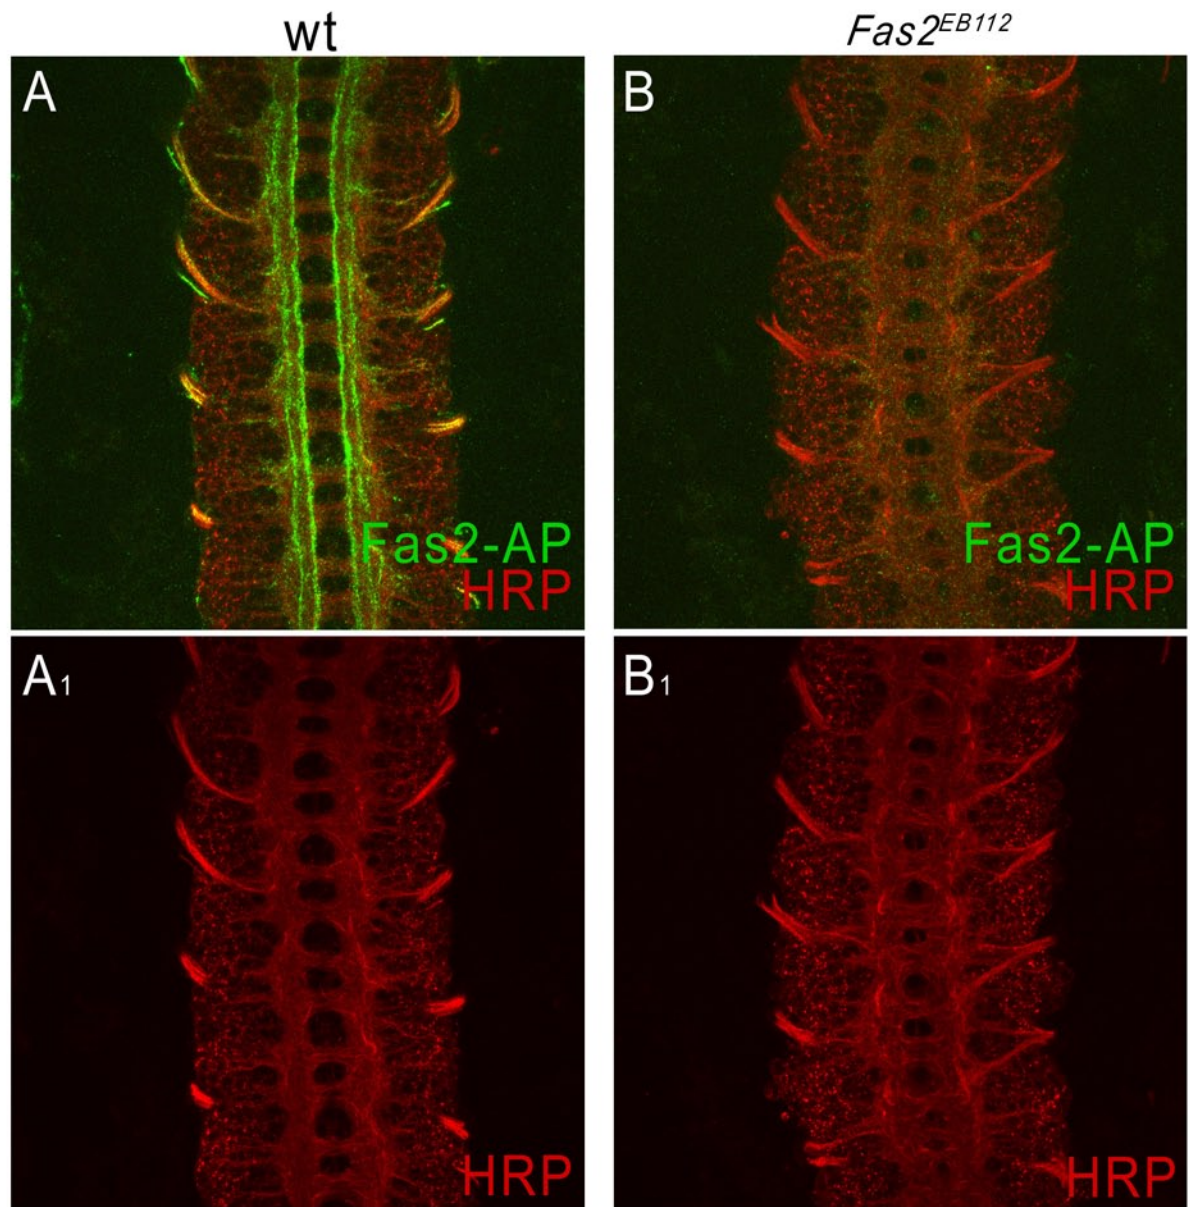

**Figure S6**, related to Figure 5. Wild-type (A, A<sub>1</sub>) and *fas2<sup>EB112</sup>* (B, B<sub>1</sub>) embryos were double-stained with Fas2-AP5 (green) and anti-HRP (red). (A, B) show both signals, and (A<sub>1</sub>, B<sub>1</sub>) show only the anti-HRP signal. The longitudinal tracts are visible in (A). In (B), there is no Fas2-AP5 staining. The CNS axon array in *fas2<sup>EB112</sup>* (B<sub>1</sub>) is indistinguishable from the wild-type array (A<sub>1</sub>).

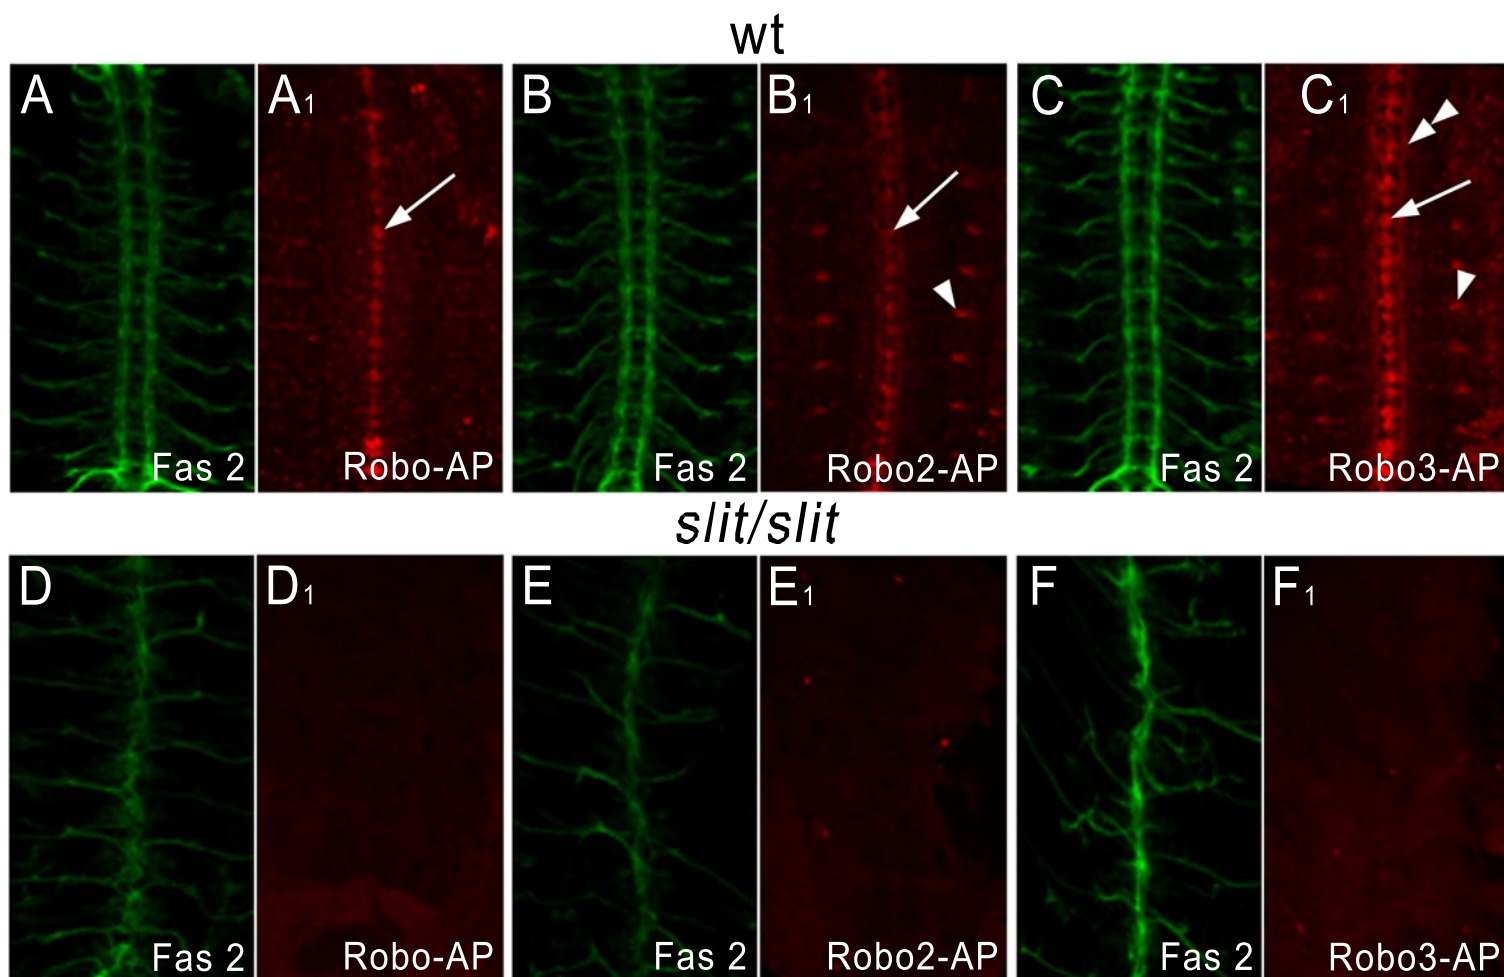

**Figure S7, related to Figure 6. Specific interactions between Roundabout (Robo) family receptors and their ligand Slit can be detected by AP5-fusion protein binding to live embryos.**

Staining was performed as in Figures 5, 6, and 7, except that binding of Robo, Lea (Robo2), and Robo3-AP5 supernatants was detected with Alexa 568 (red) and anti-Fas2 mAb staining with Alexa 488 (green).

**(A-C)** Wild-type embryos stained with Robo-AP5 (A1), Robo2-AP5 (B1), and Robo3-AP5 (C1). Each of these fusion proteins stains the expected pattern of Slit-expressing midline glia (arrows), and Robo2 and Robo3-AP5 stain muscle attachment sites (arrowheads), which also express Slit. Slit synthesized by midline glia is known to be transferred onto longitudinal axons. Note, however, that Robo-AP5 does not stain axons, while Robo3-AP5 does (double arrowhead). Robo2-AP5 shows weak staining of medial axons.

**(D-F)** Embryos homozygous for a null *slit* mutation (*slit/slit*) have a severe phenotype in which all CNS axons collapse onto the midline (D, E, F). They do not stain with any of the Robo family AP fusion proteins (D1, E1, F1). This shows that all staining with these fusion proteins, including CNS axon staining by Robo2-AP5 and Robo3-AP5, is due to binding to Slit protein.
